# Supplementary material for: When face-tracking meets social networks: a story of politics in news videos
Source: Springer Nature journal article supplement (doi:10.1007/s41109-016-0003-2), 2016-05-31
Supplement: MOESM1 [file 11855182]

Appendix

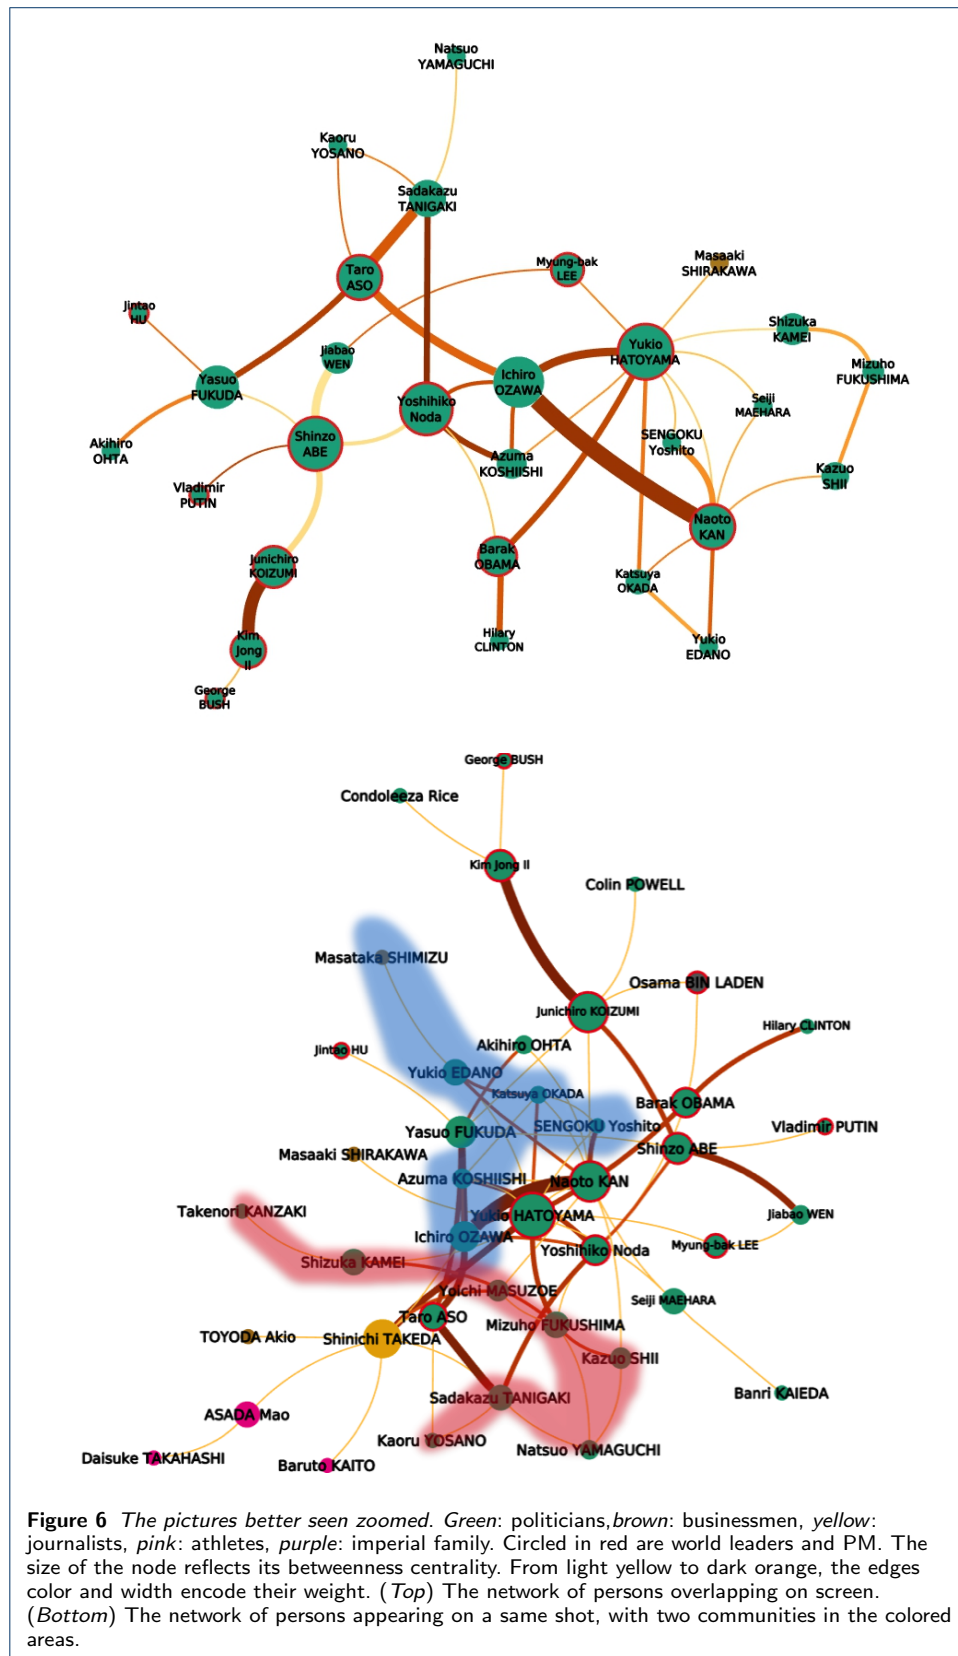

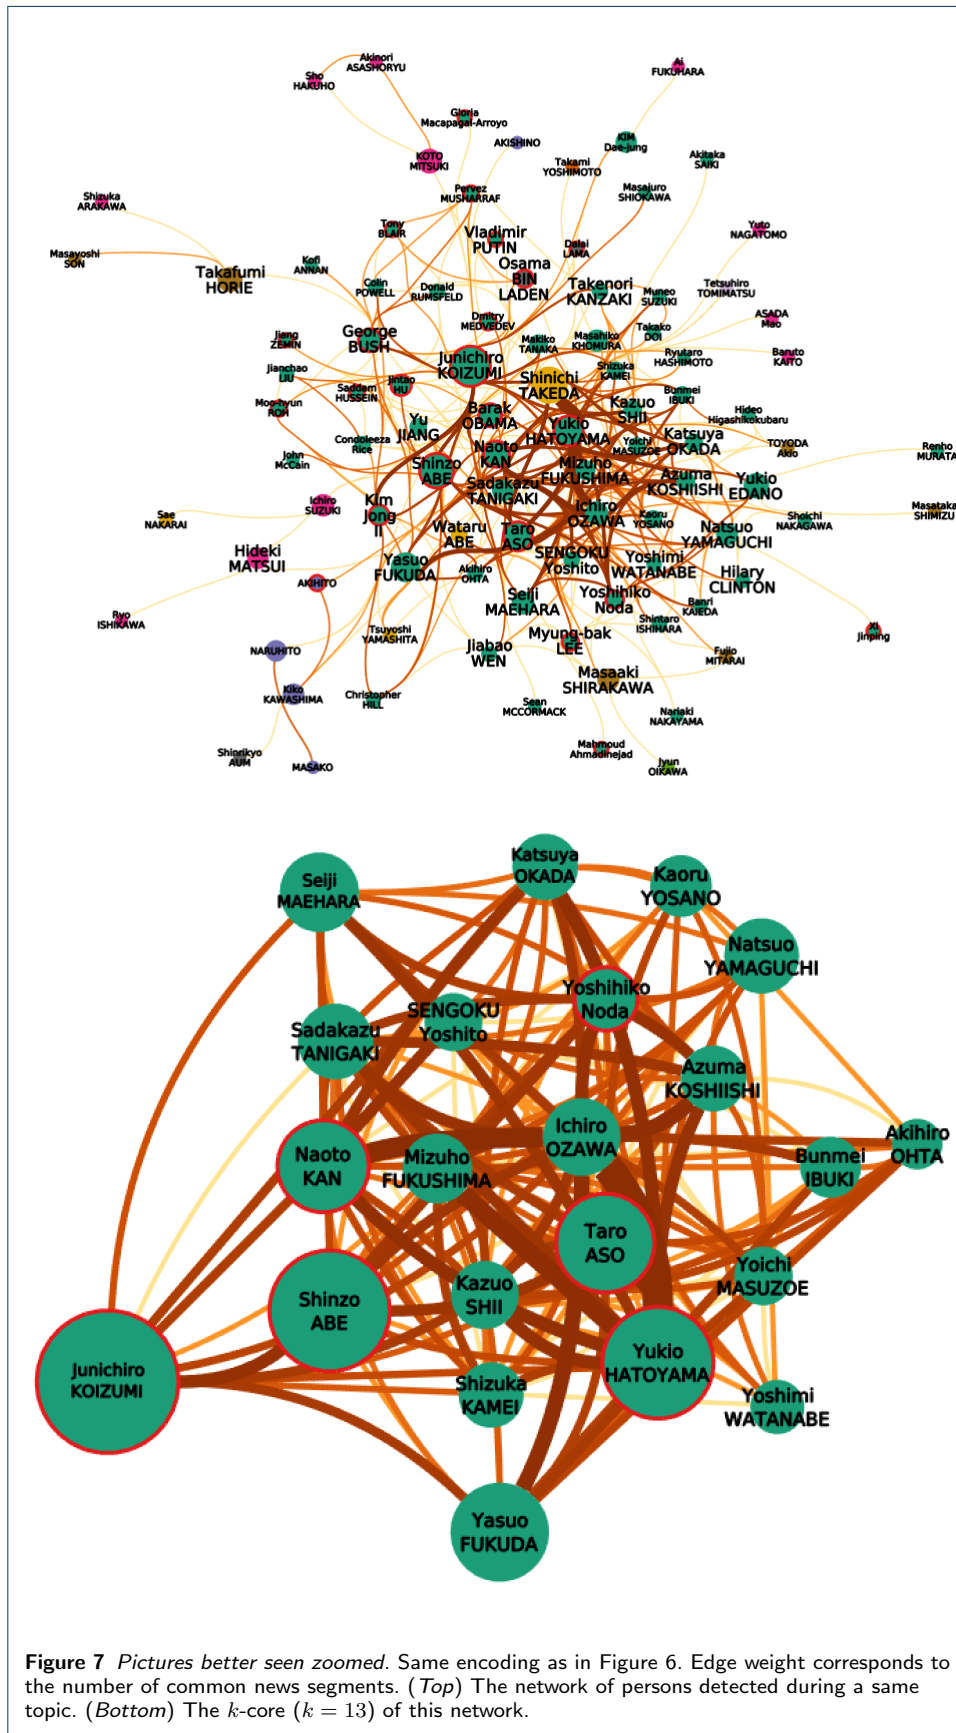

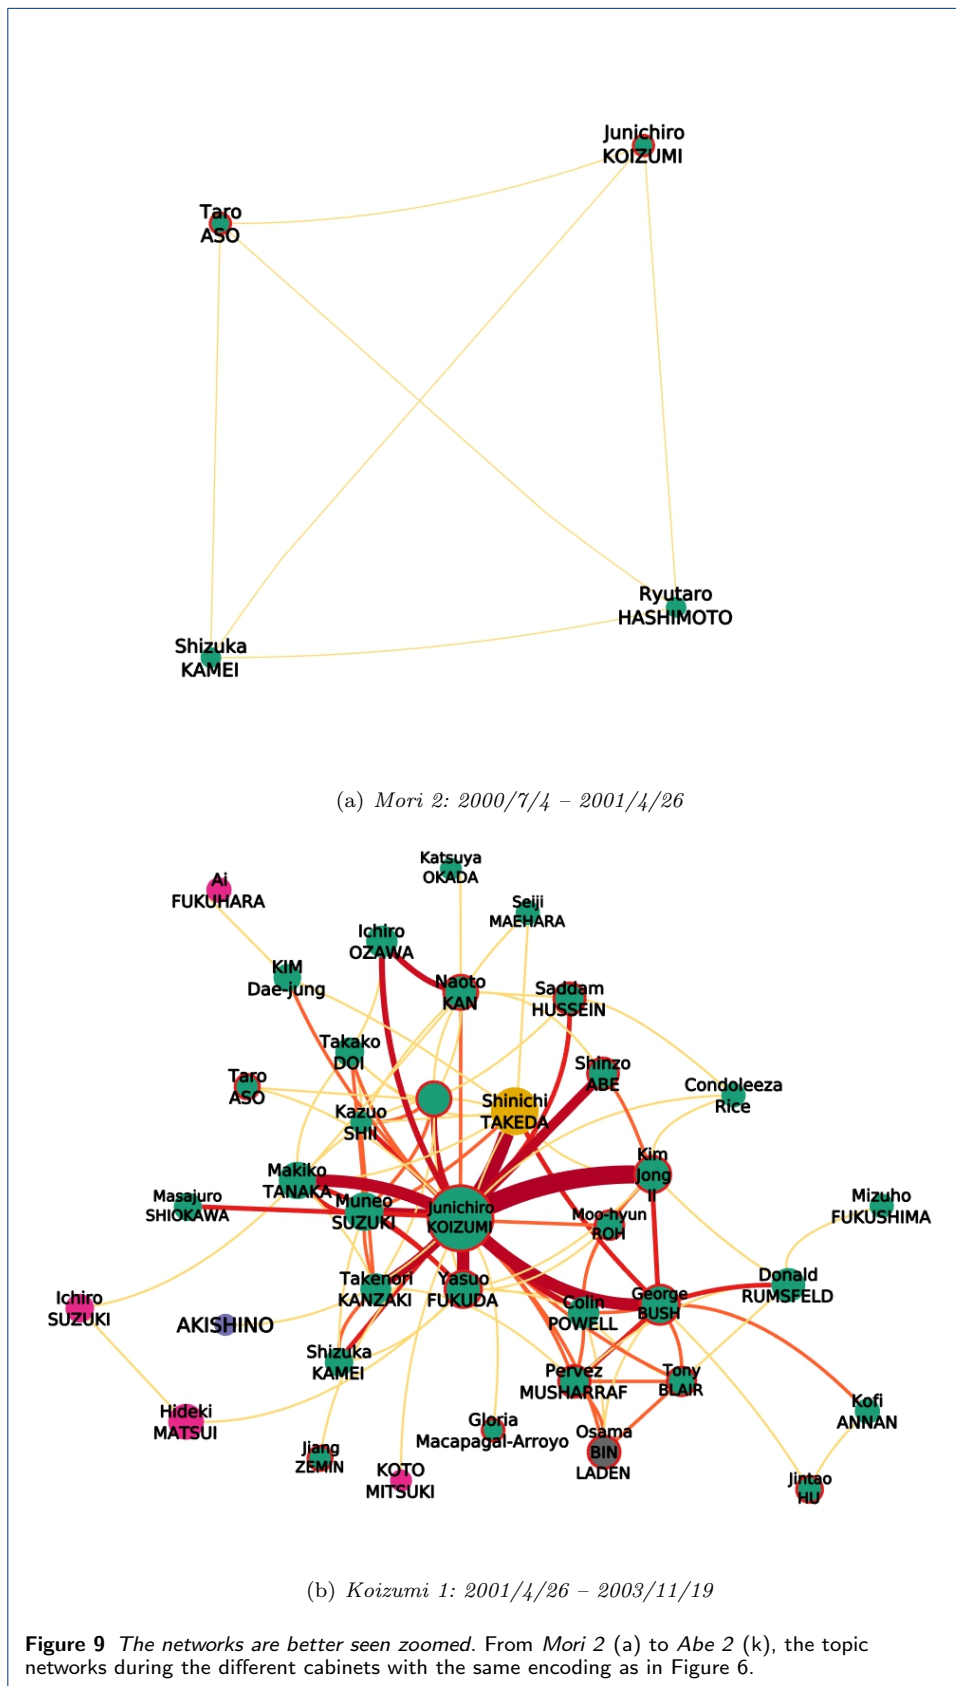

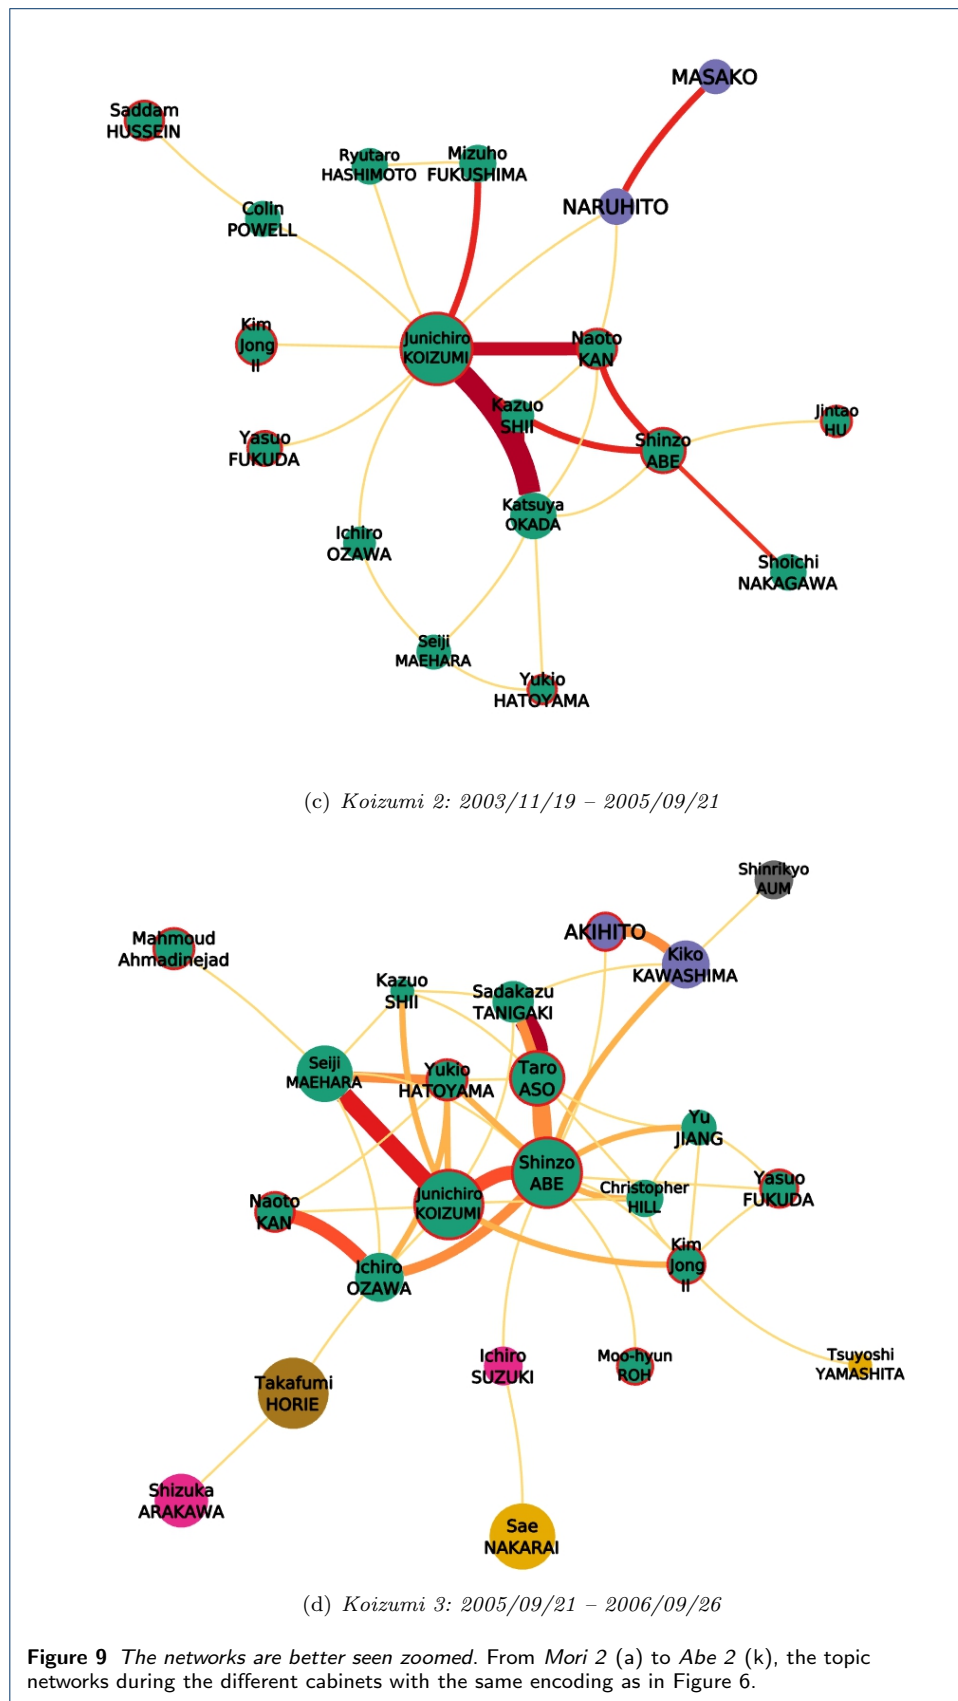

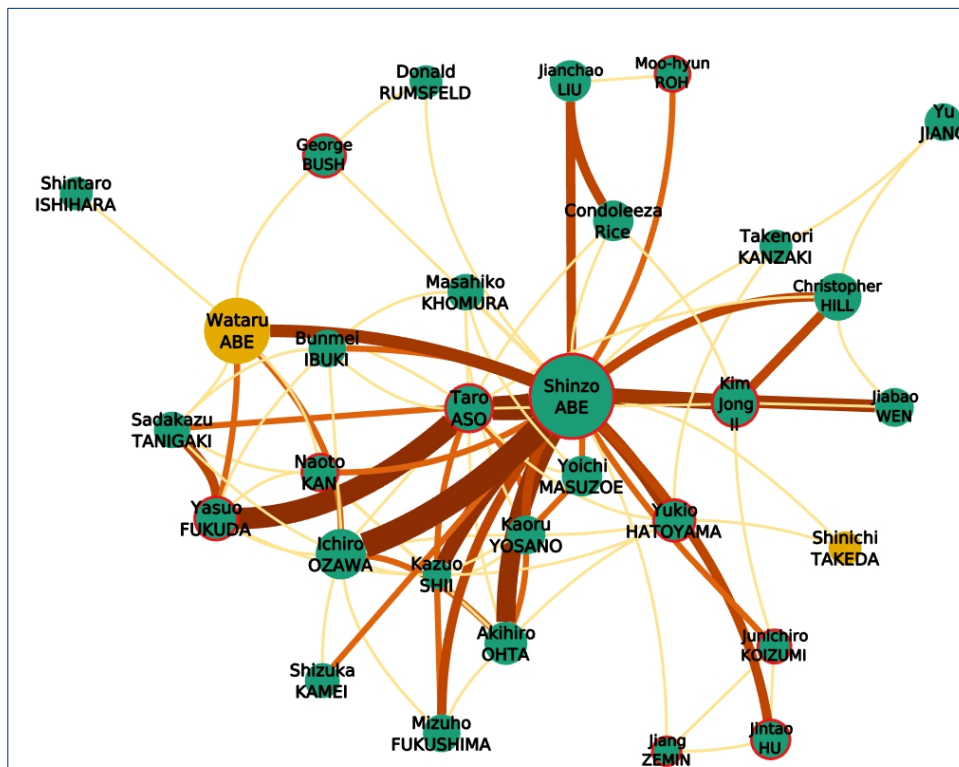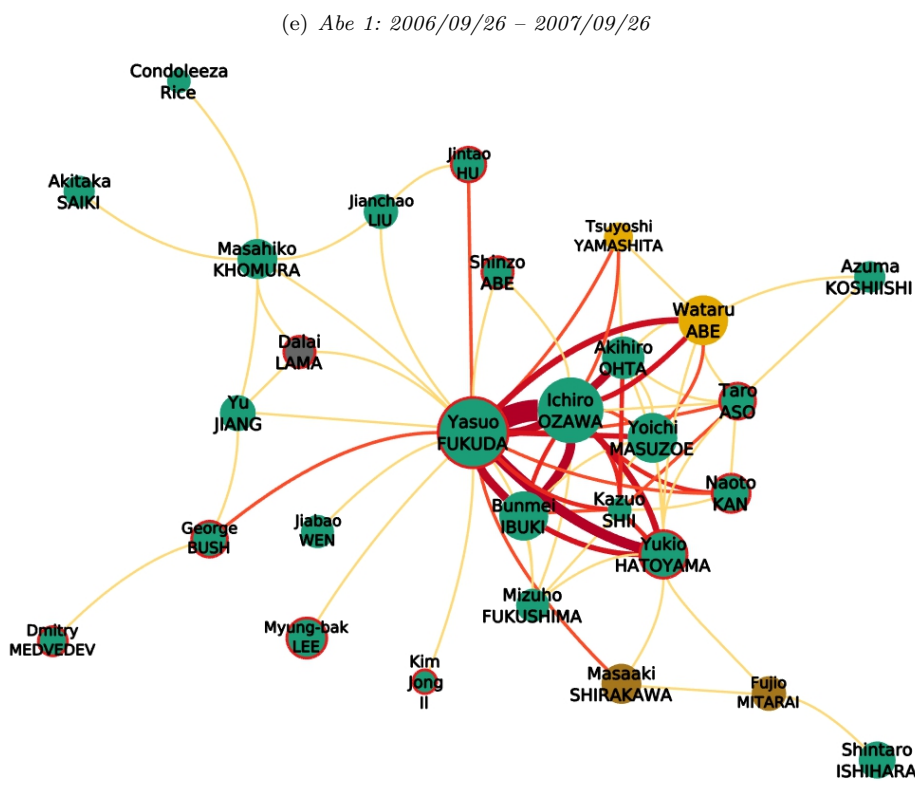

Figure 9 The networks are better seen zoomed. From Mori 2 (a) to Abe 2 (k), the topic networks during the different cabinets with the same encoding as in Figure 6.

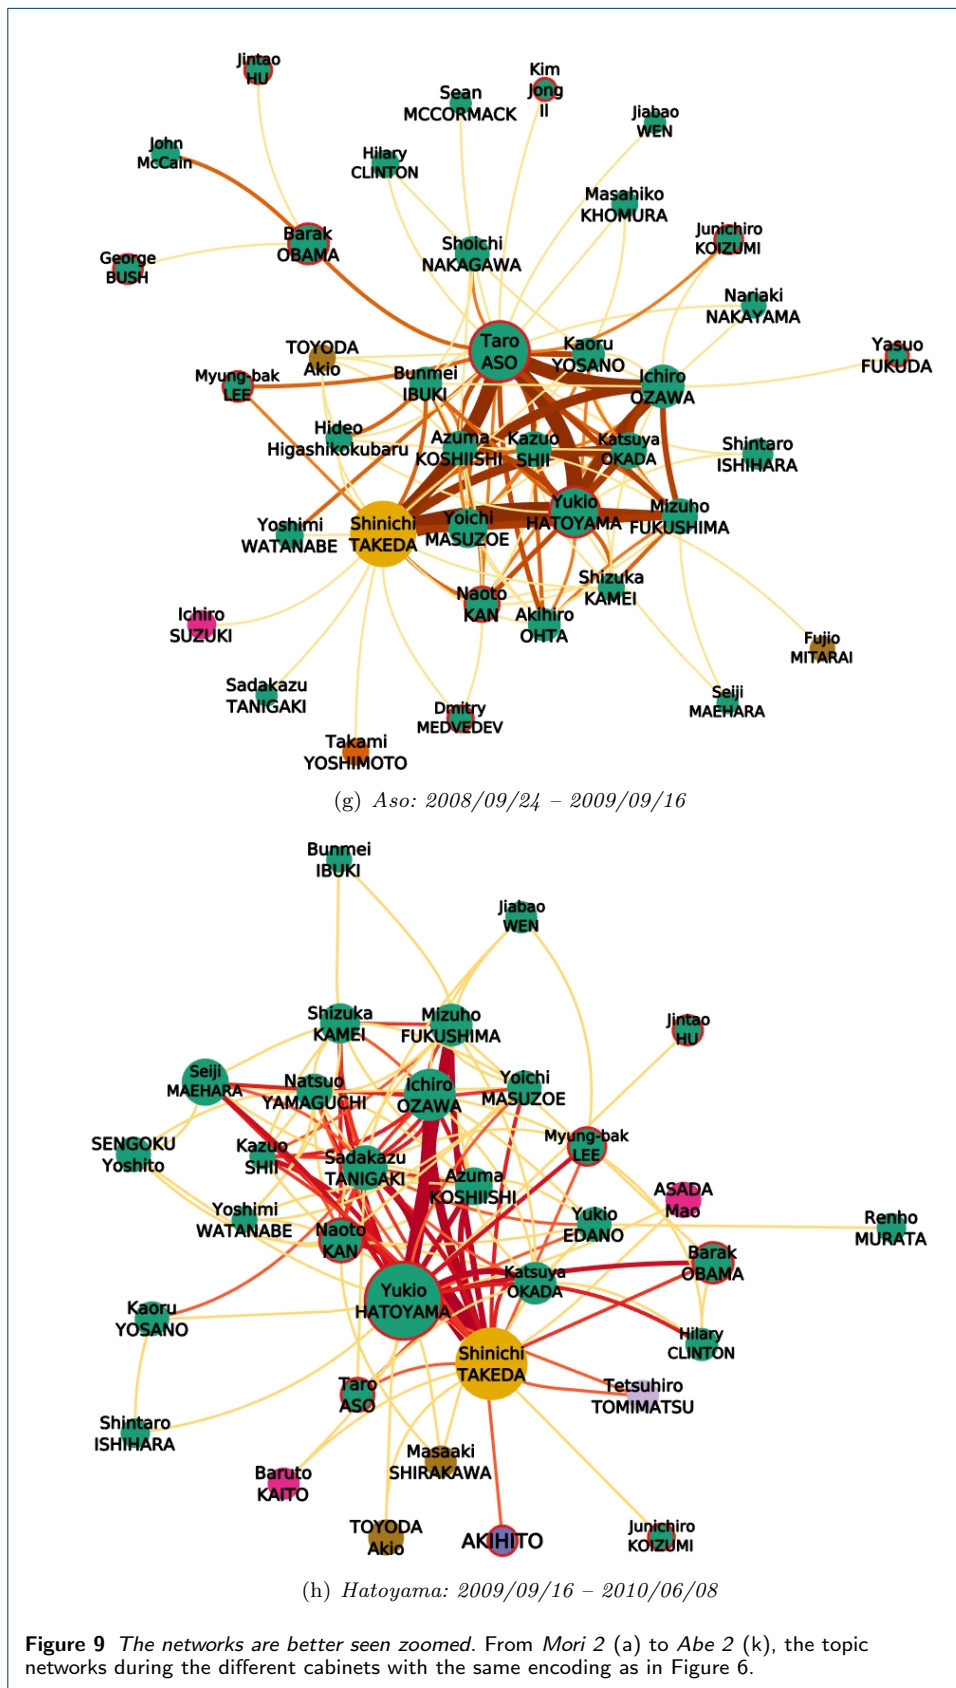

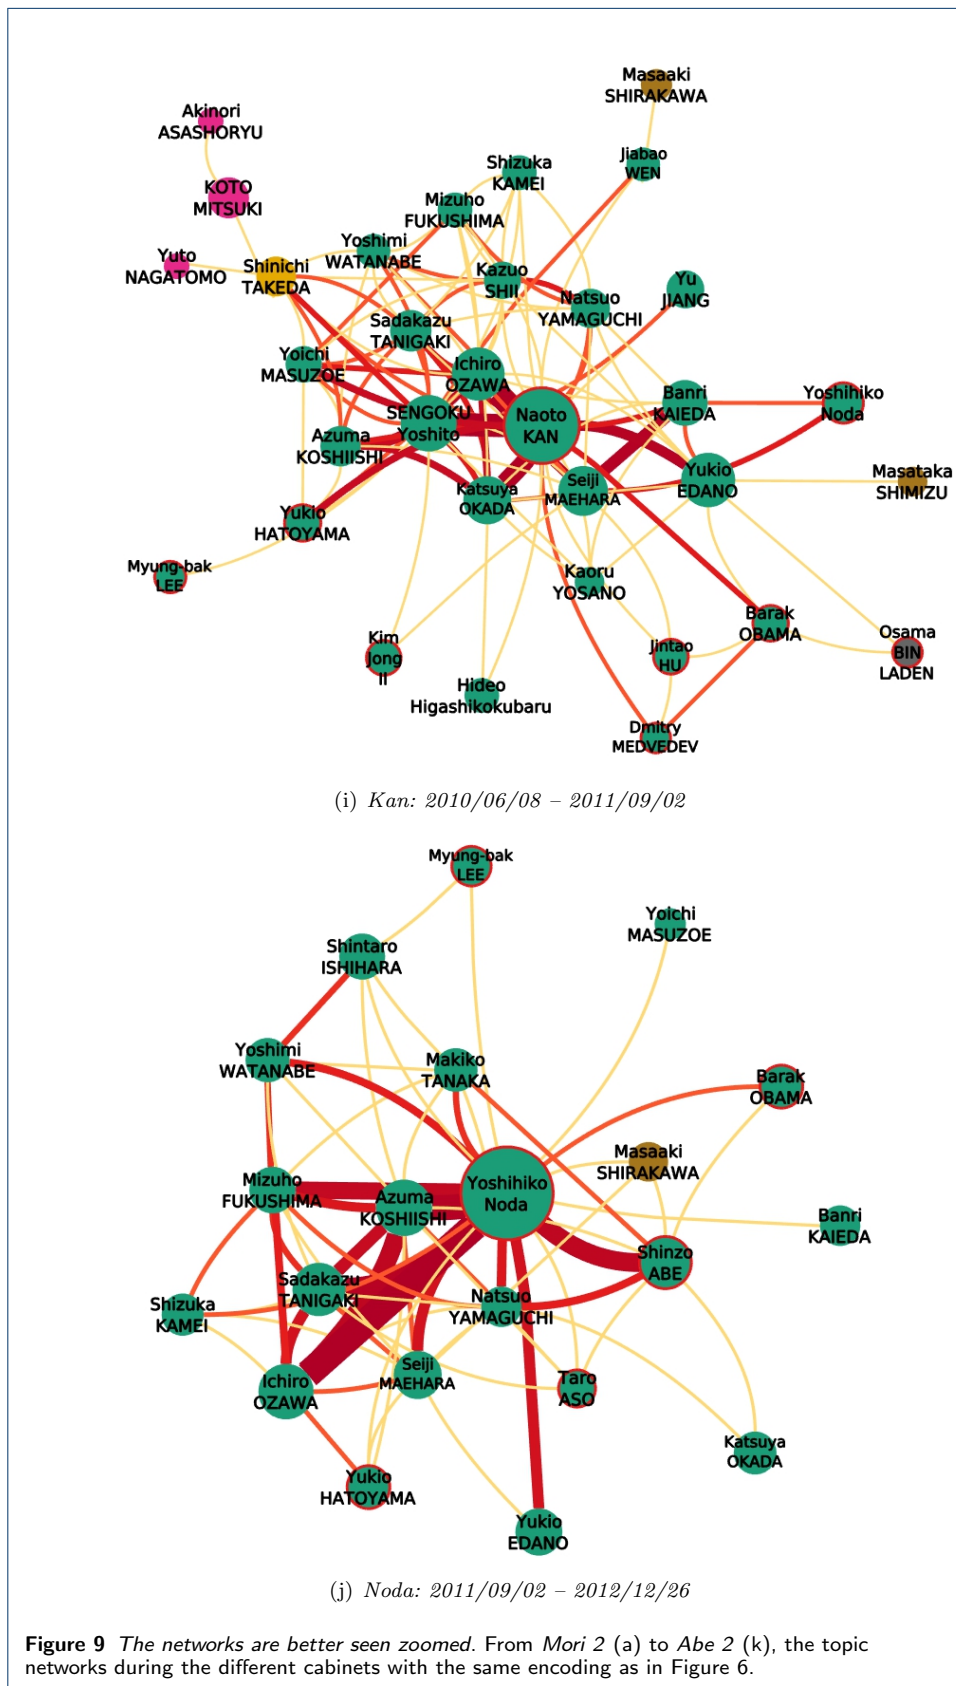

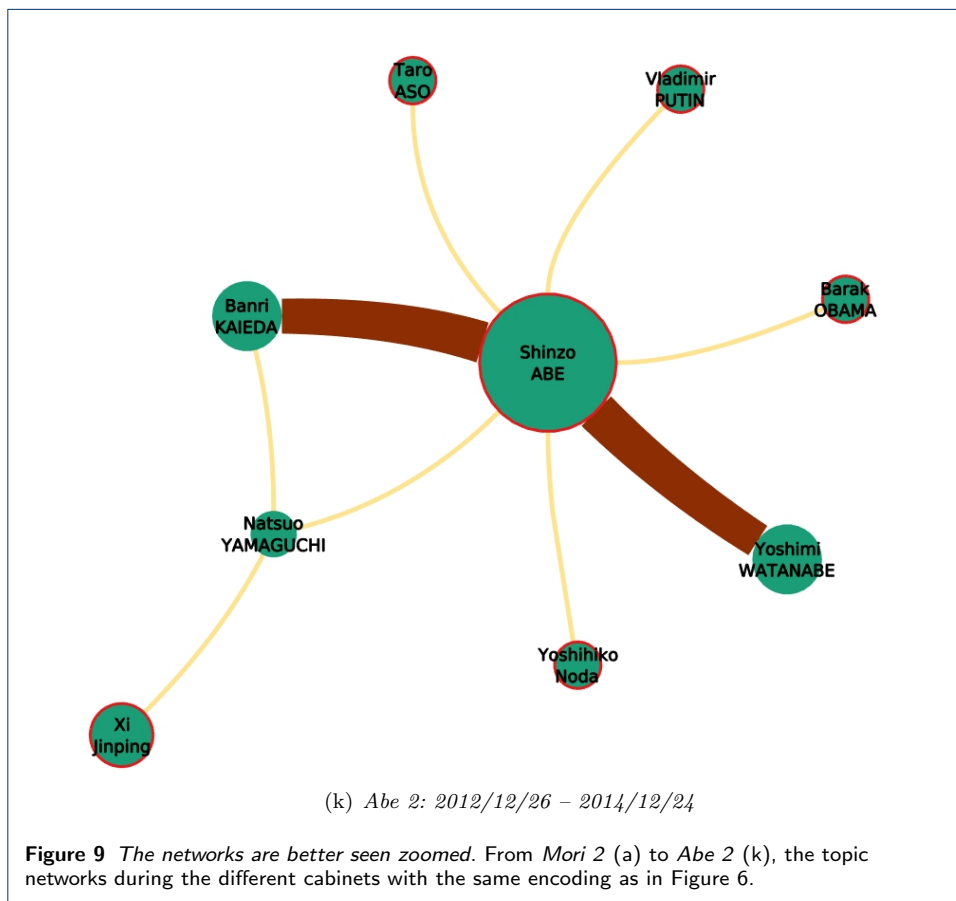



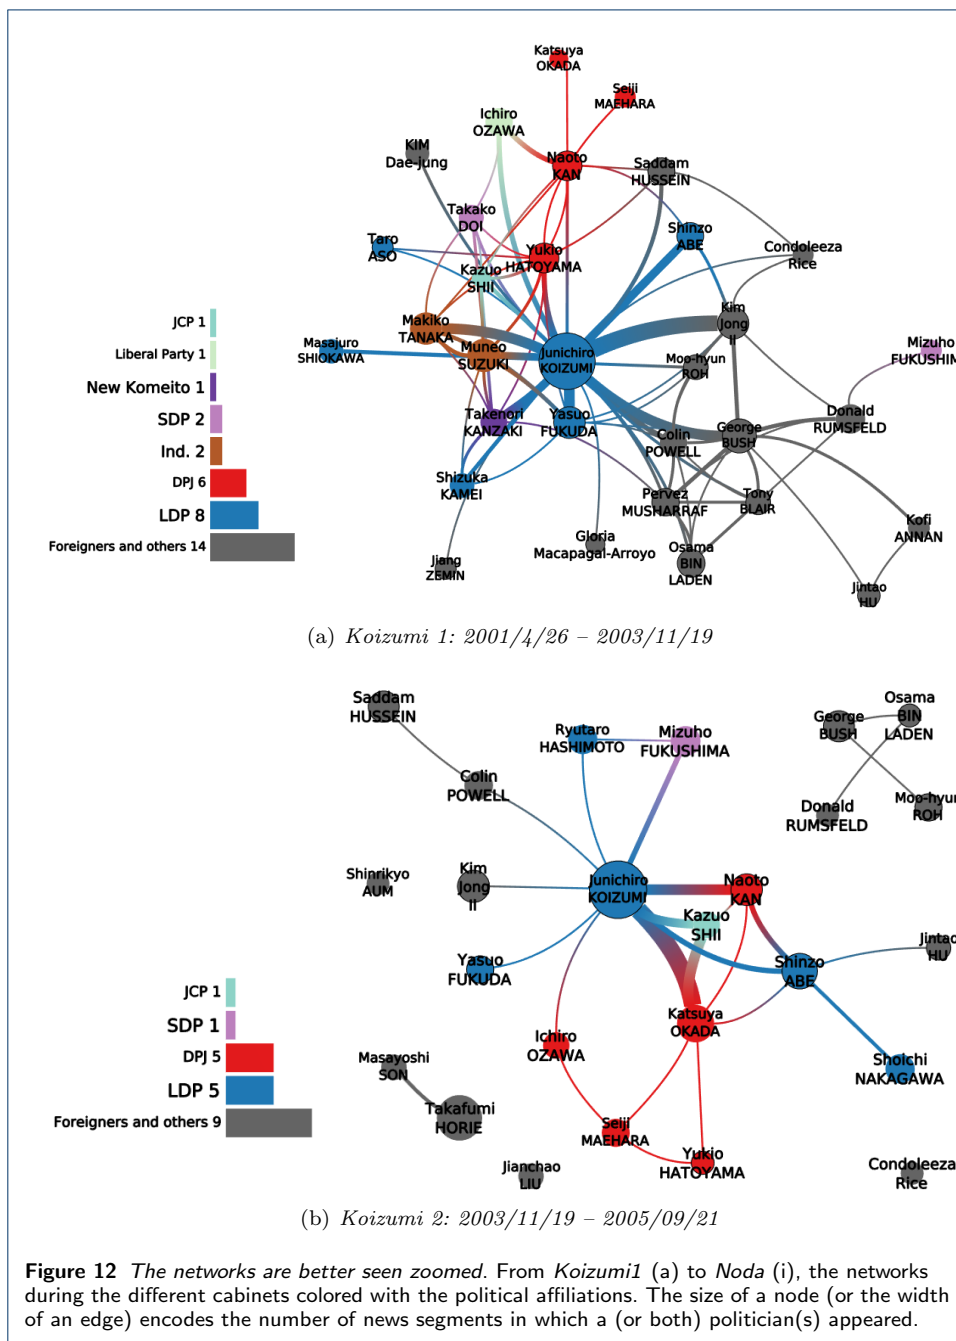

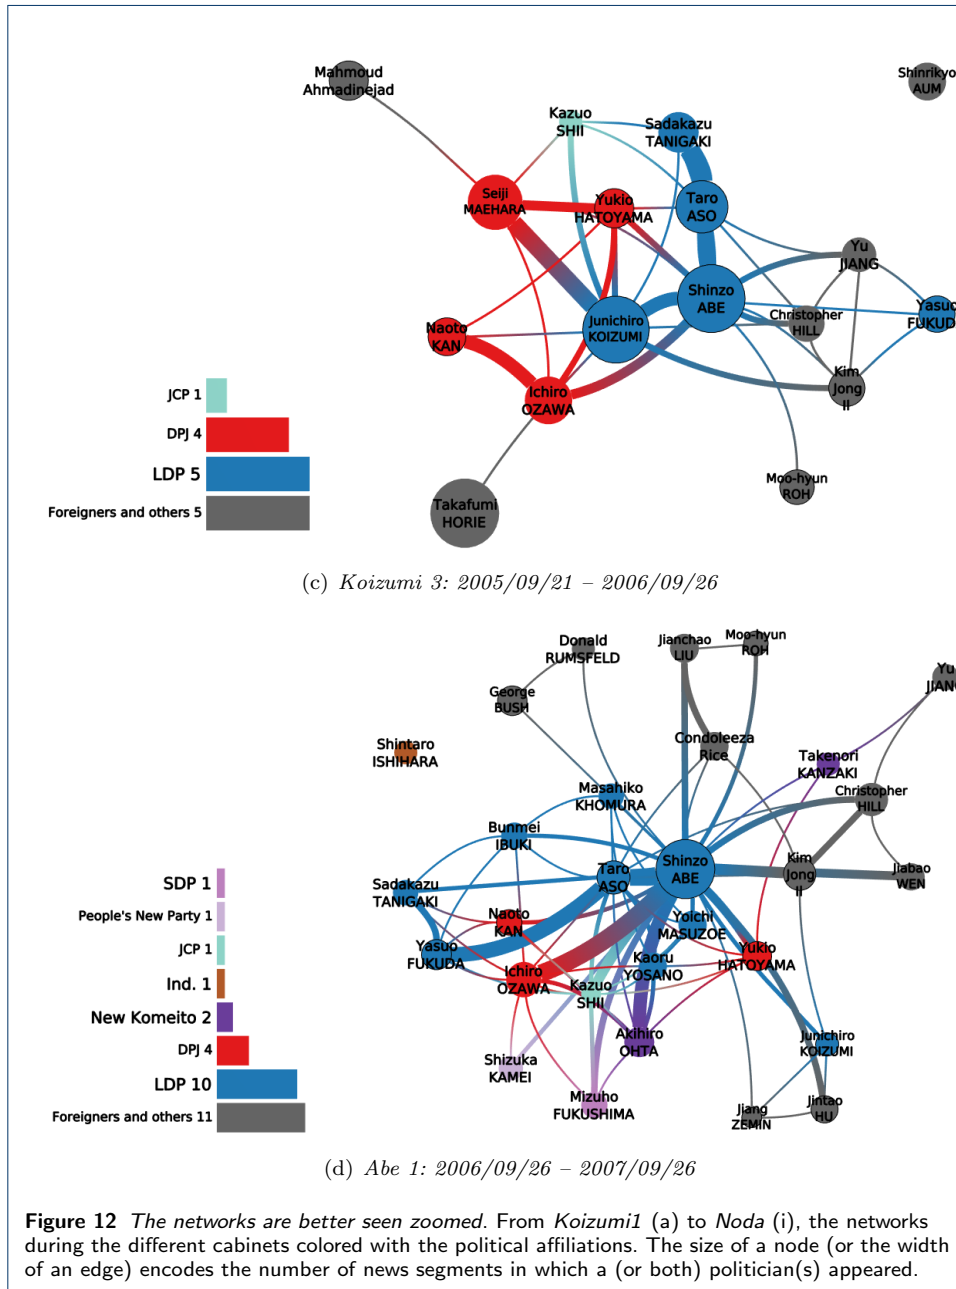

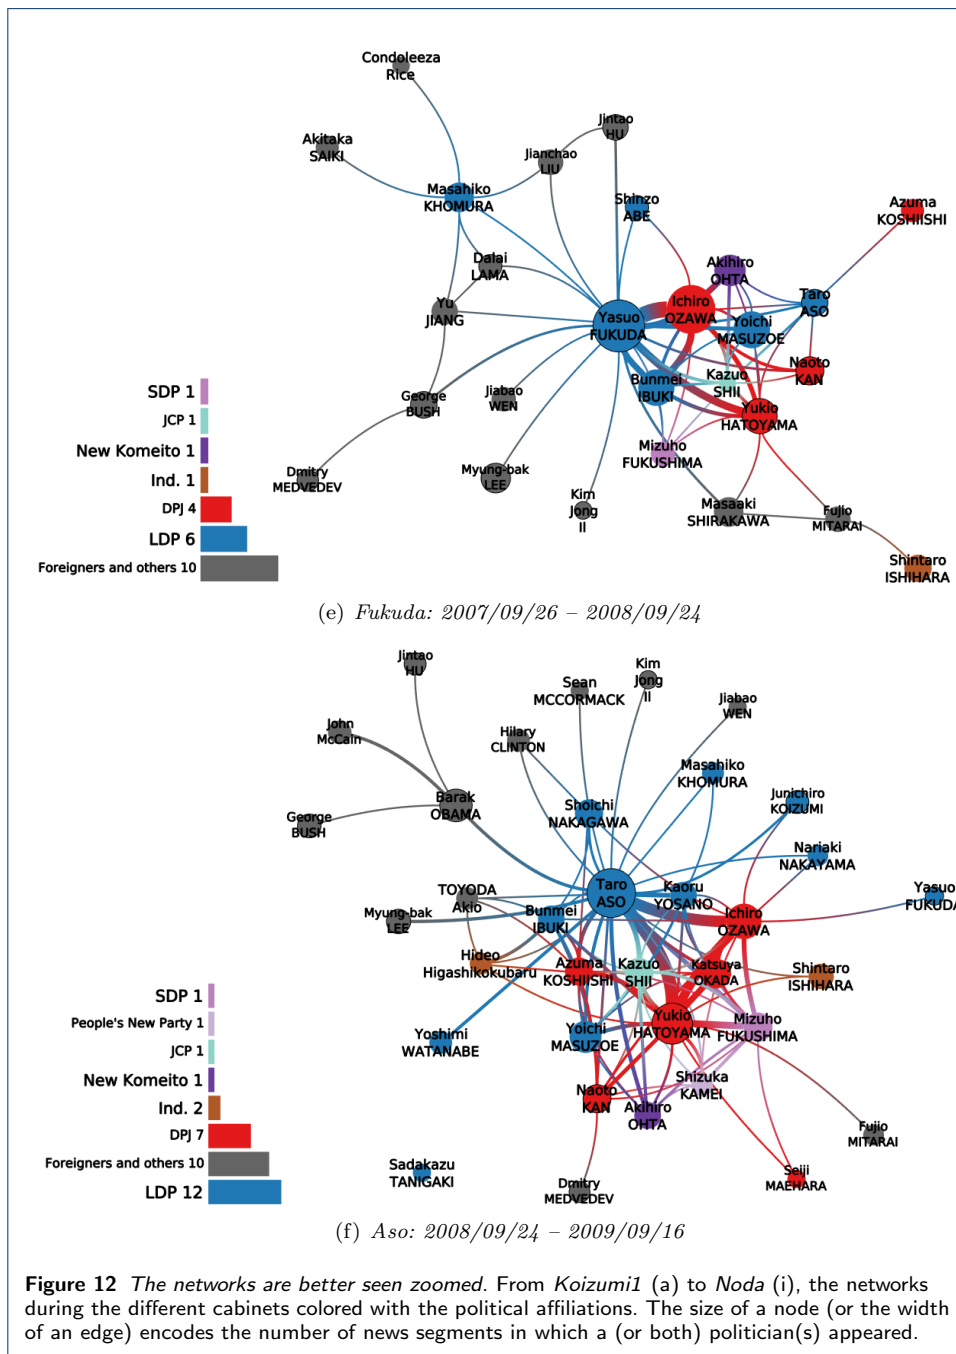

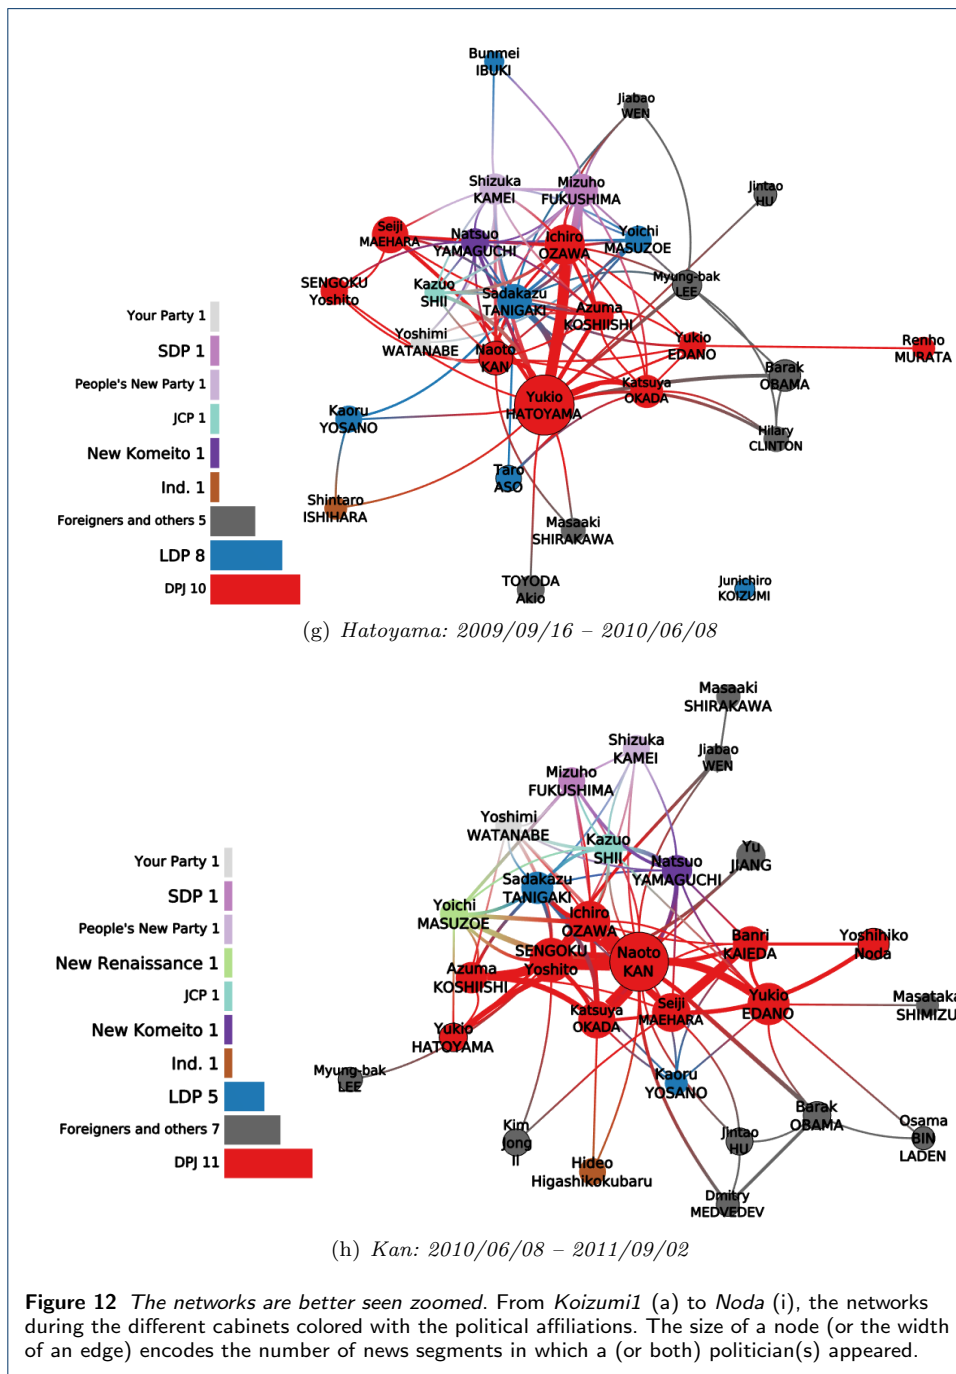

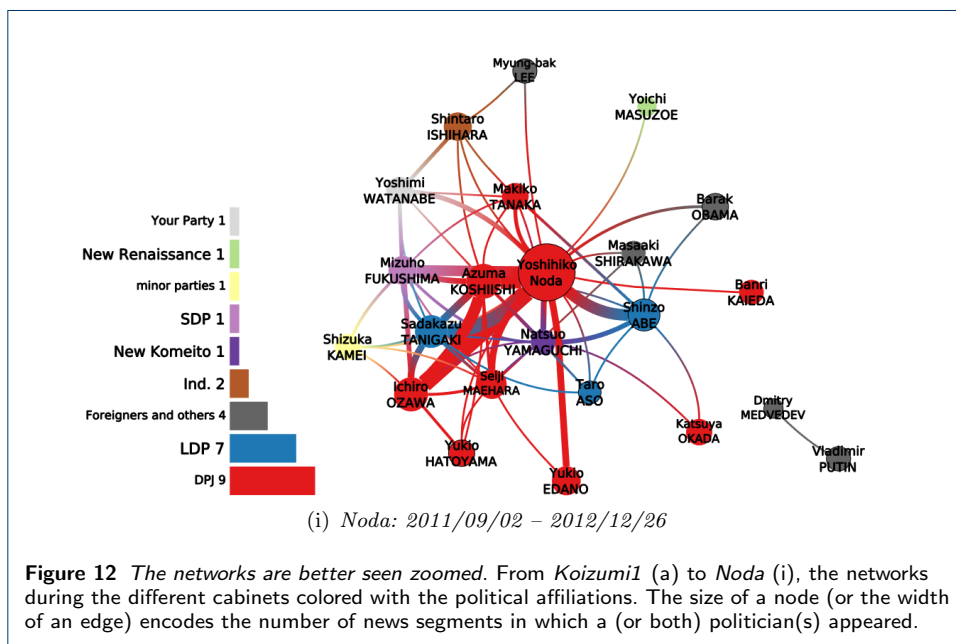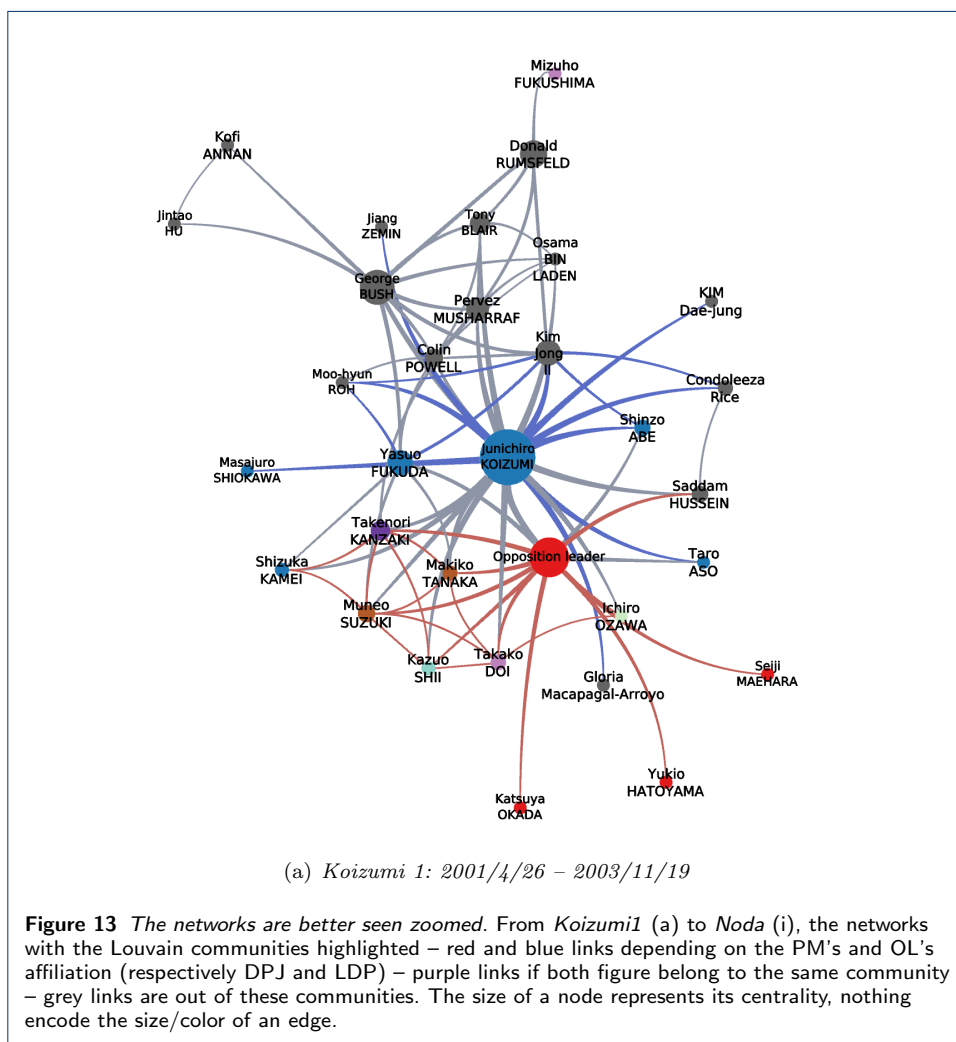

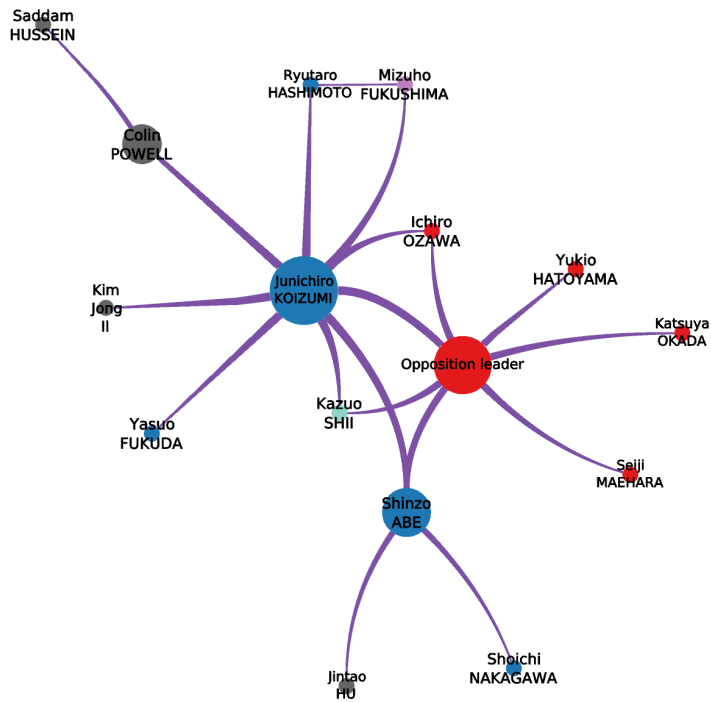

(b) *Koizumi 2: 2003/11/19 - 2005/09/21*

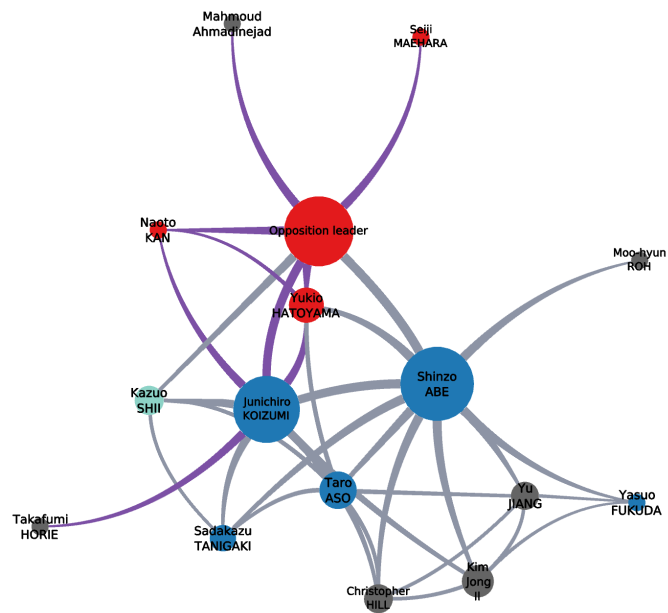

(c) *Koizumi 3: 2005/09/21 - 2006/09/26*

**Figure 13** *The networks are better seen zoomed. From Koizumi1 (a) to Noda (i), the networks with the Louvain communities highlighted – red and blue links depending on the PM’s and OL’s affiliation (respectively DPJ and LDP) – purple links if both figure belong to the same community – grey links are out of these communities. The size of a node represents its centrality, nothing encode the size/color of an edge.*

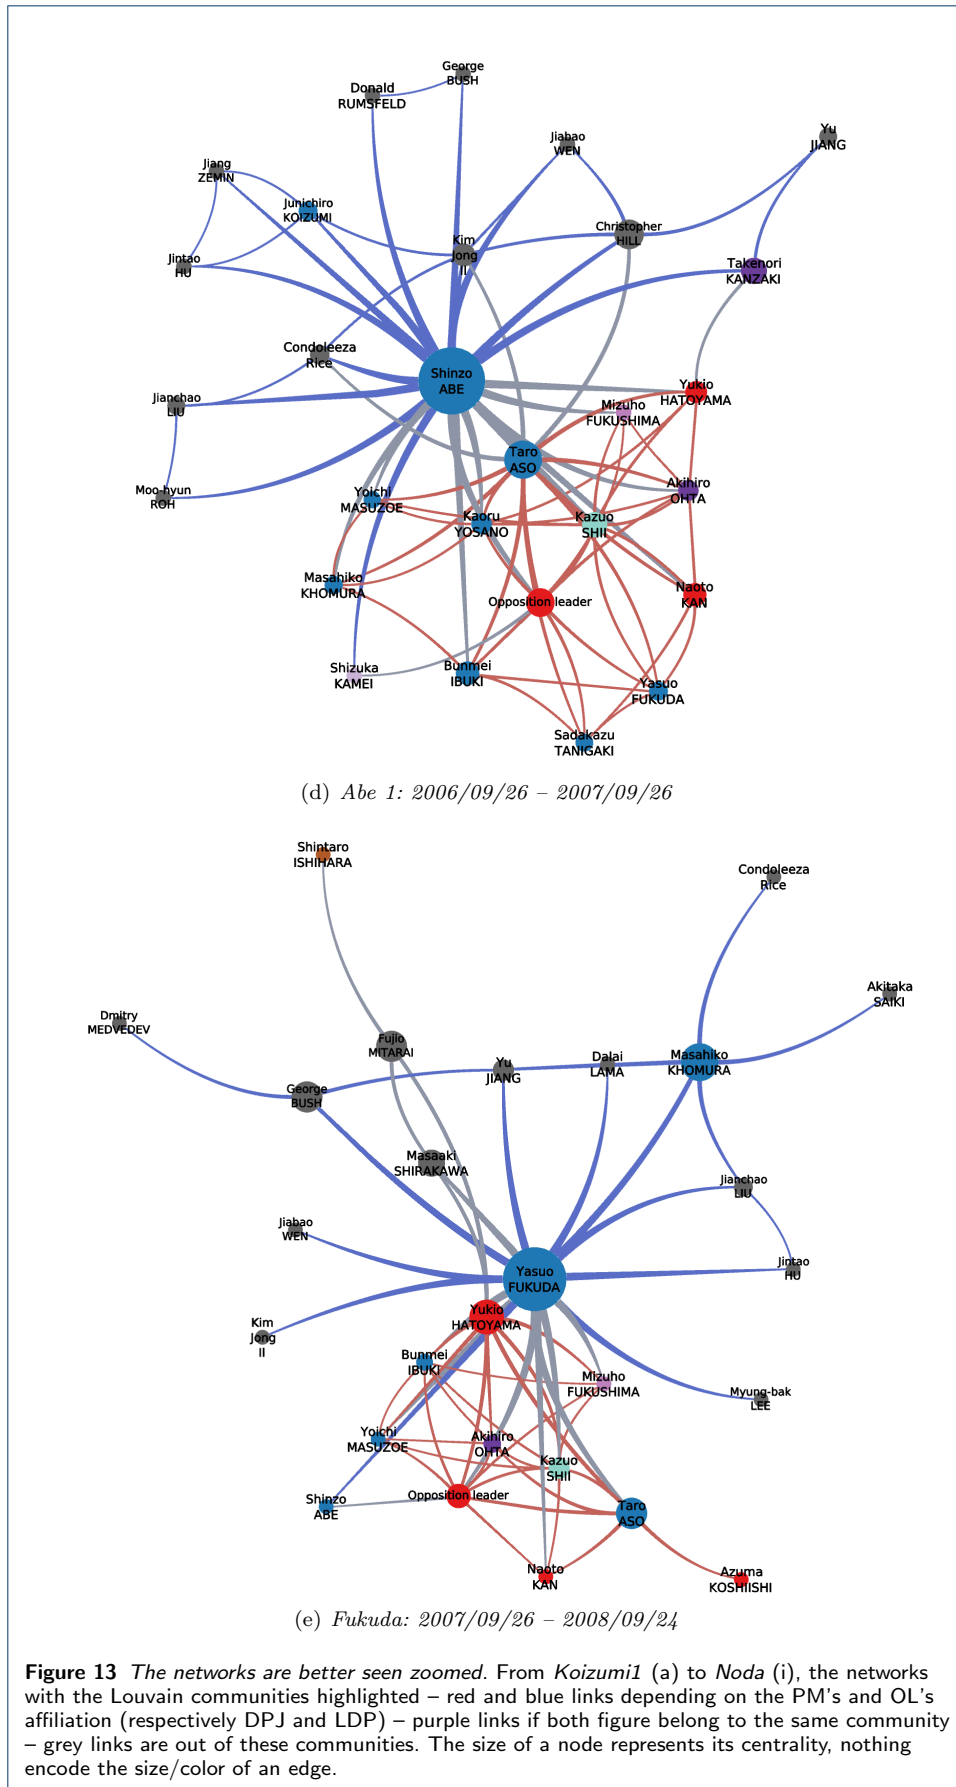

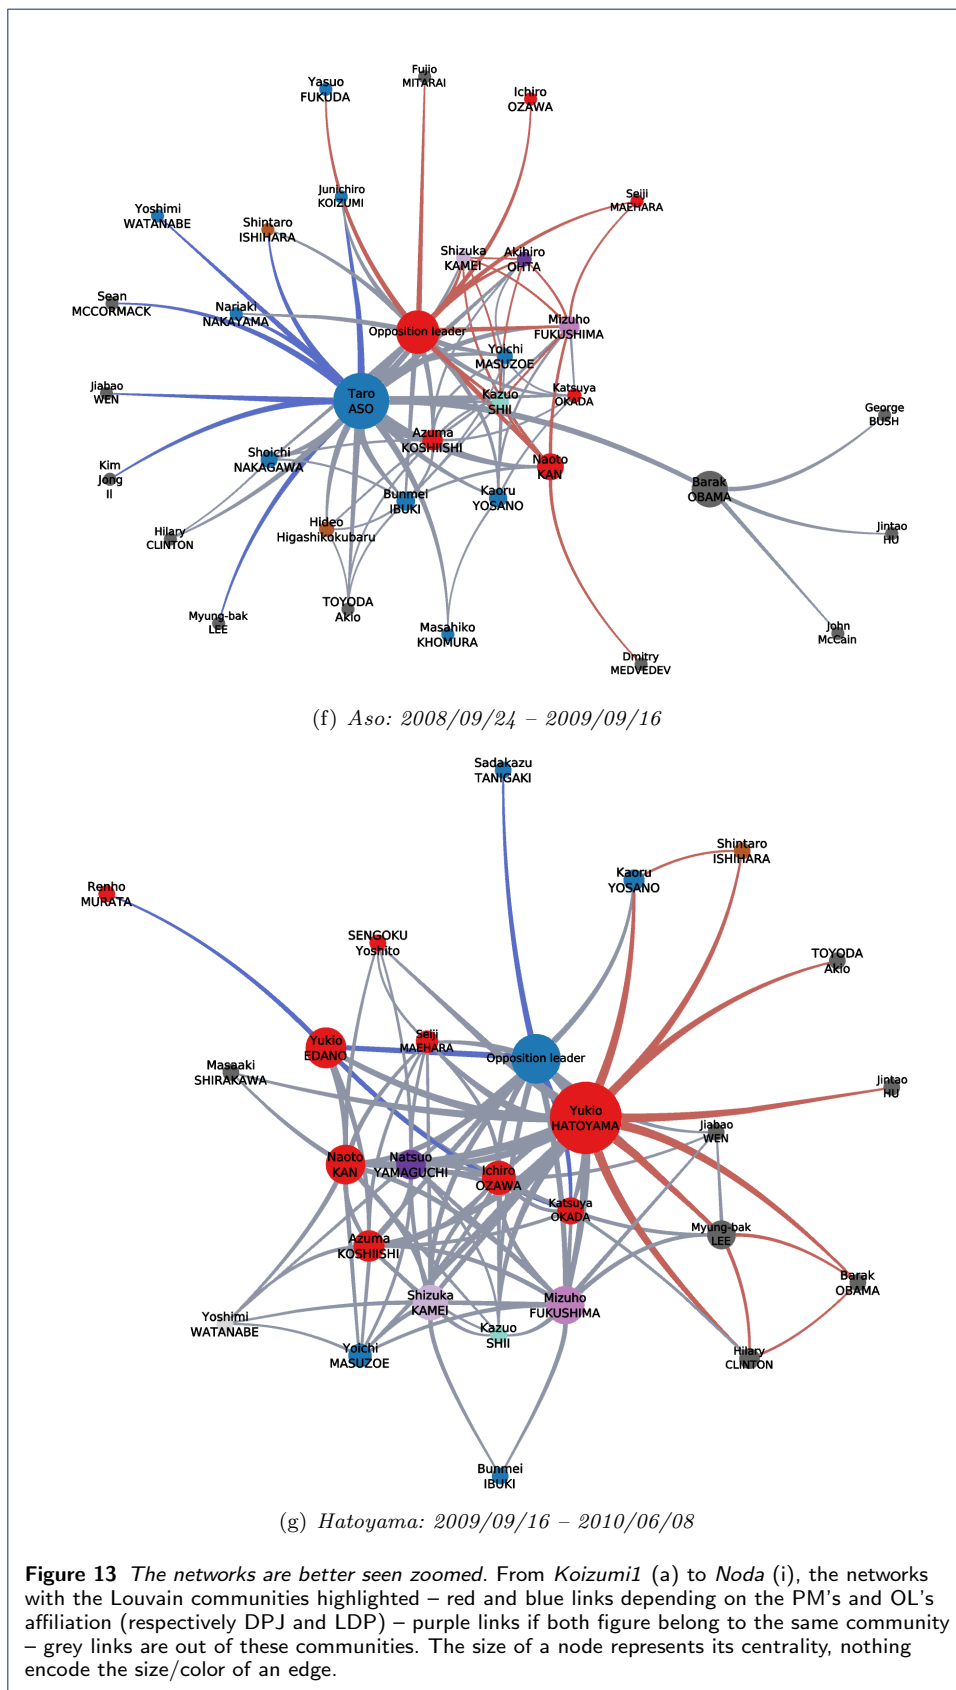



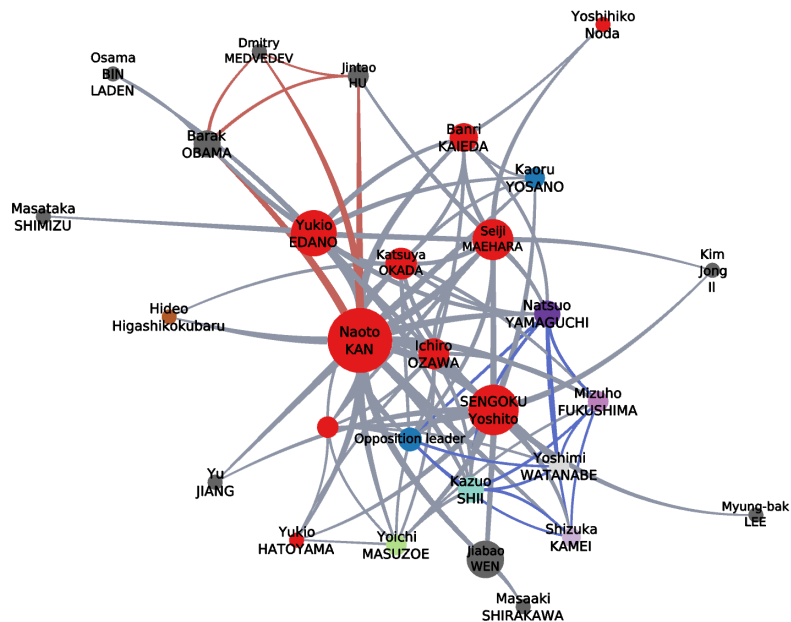

(h) Kan: 2010/06/08 – 2011/09/02

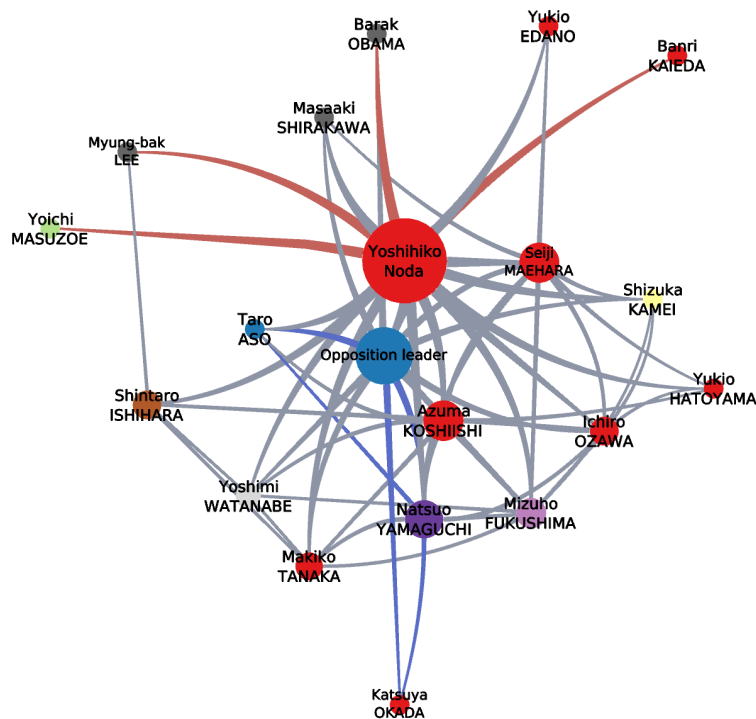

(i) Noda: 2011/09/02 – 2012/12/26

**Figure 13** The networks are better seen zoomed. From Koizumi1 (a) to Noda (i), the networks with the Louvain communities highlighted – red and blue links depending on the PM’s and OL’s affiliation (respectively DPJ and LDP) – purple links if both figure belong to the same community – grey links are out of these communities. The size of a node represents its centrality, nothing encode the size/color of an edge.
